# Supplementary material for: UHPLC-MS Phytochemical Profiling and Insight into Bioactivity of Rabelera holostea (Greater Stitchwort) Extract
Source: MDPI journal article supplement (doi:10.3390/molecules28031274), 2023-01-28
Supplement: s1 [file s1]

## Supplementary material

### UHPLC-MS Phytochemical Profiling and Insight into Bioactivity of Rabelera holostea (Greater Stitchwort) Extract

Jelena S. Katanić Stanković <sup>1,\*</sup>, Jelena Đorović Jovanović <sup>1</sup>, Danijela Mišić <sup>2</sup>, Uroš Gašić <sup>2</sup>, Stefanie Nikles <sup>3</sup>, Zoran Marković <sup>1</sup>, Rudolf Bauer <sup>3,\*</sup>

<sup>1</sup> *University of Kragujevac, Institute for Information Technologies Kragujevac, Department of Science, Jovana Cvijića bb, 34000 Kragujevac, Serbia*

<sup>2</sup> *University of Belgrade, Institute for Biological Research "Siniša Stanković" – National Institute of Republic of Serbia, Department of Plant Physiology, Bulevar Despota Stefana 142, 11060 Belgrade, Serbia*

<sup>3</sup> *University of Graz, Institute for Pharmaceutical Sciences, Department of Pharmacognosy, Bethovenstrasse 8, 8010 Graz, Austria*

Correspondence: jkatanic@kg.ac.rs (J.S.K.S.); rudolf.bauer@uni-graz.at (R.B.)

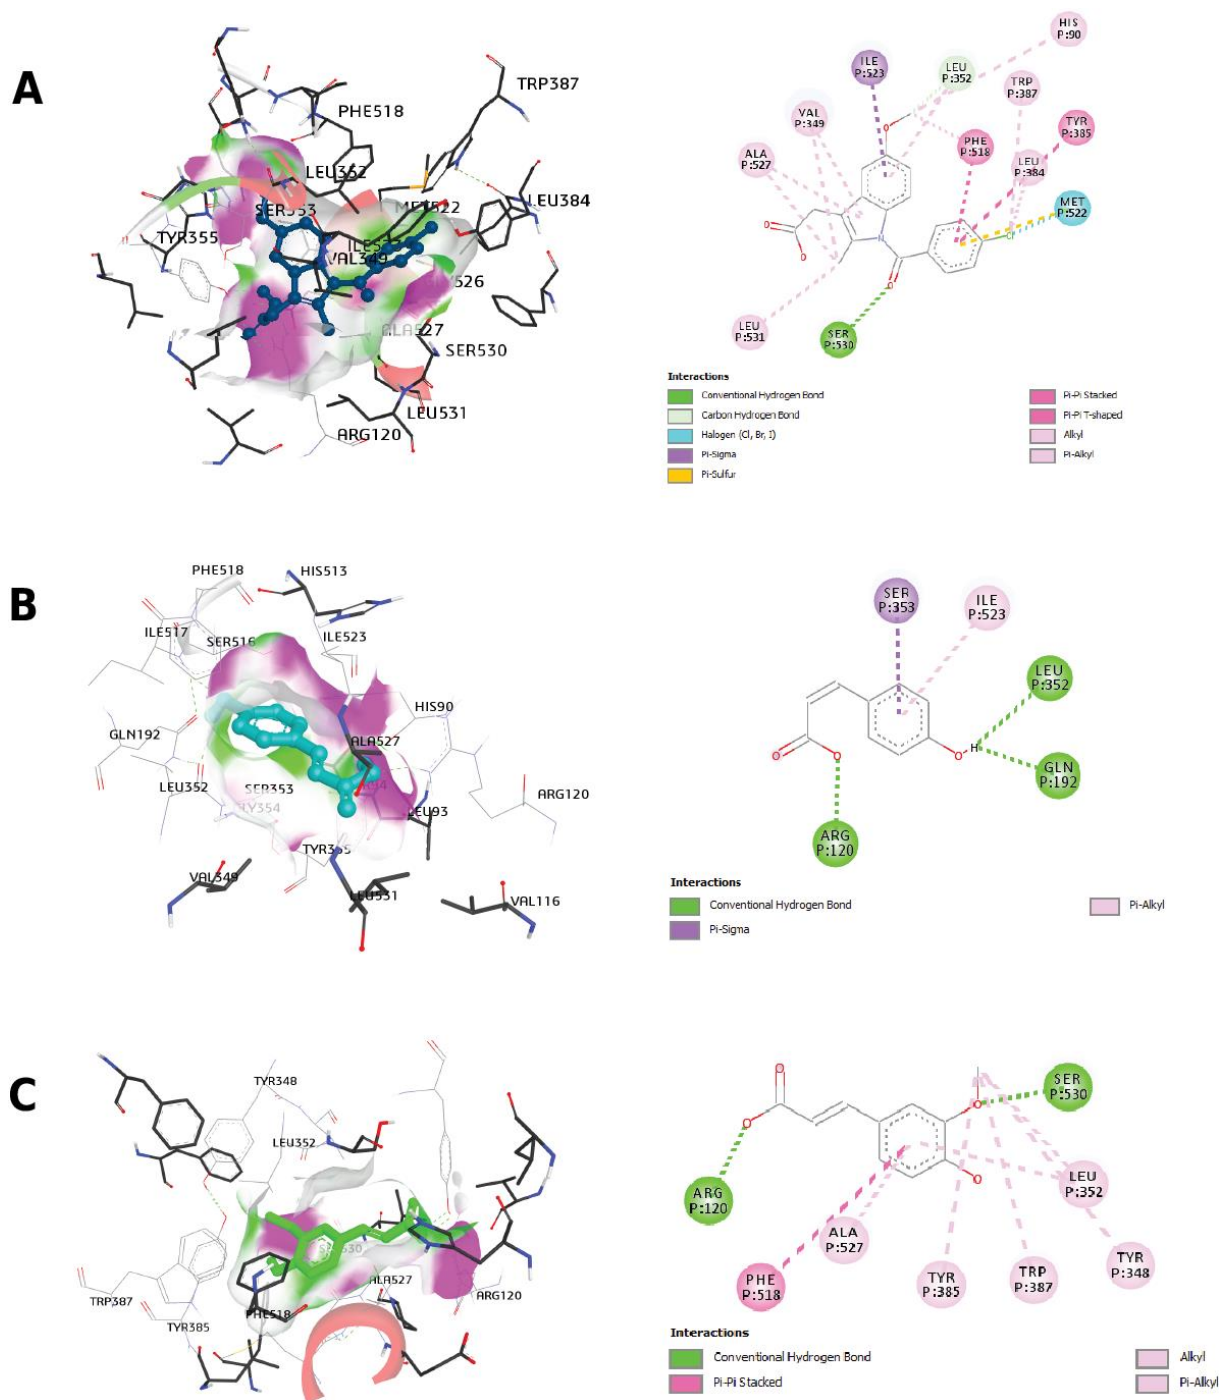

**Figure S1.** The established interactions of the most stable conformations of protein-ligand complex structures of: A – indomethacin (IND), B – *p*-coumaric acid (*p*-CA), and C – ferulic acid (FA) and COX-1.

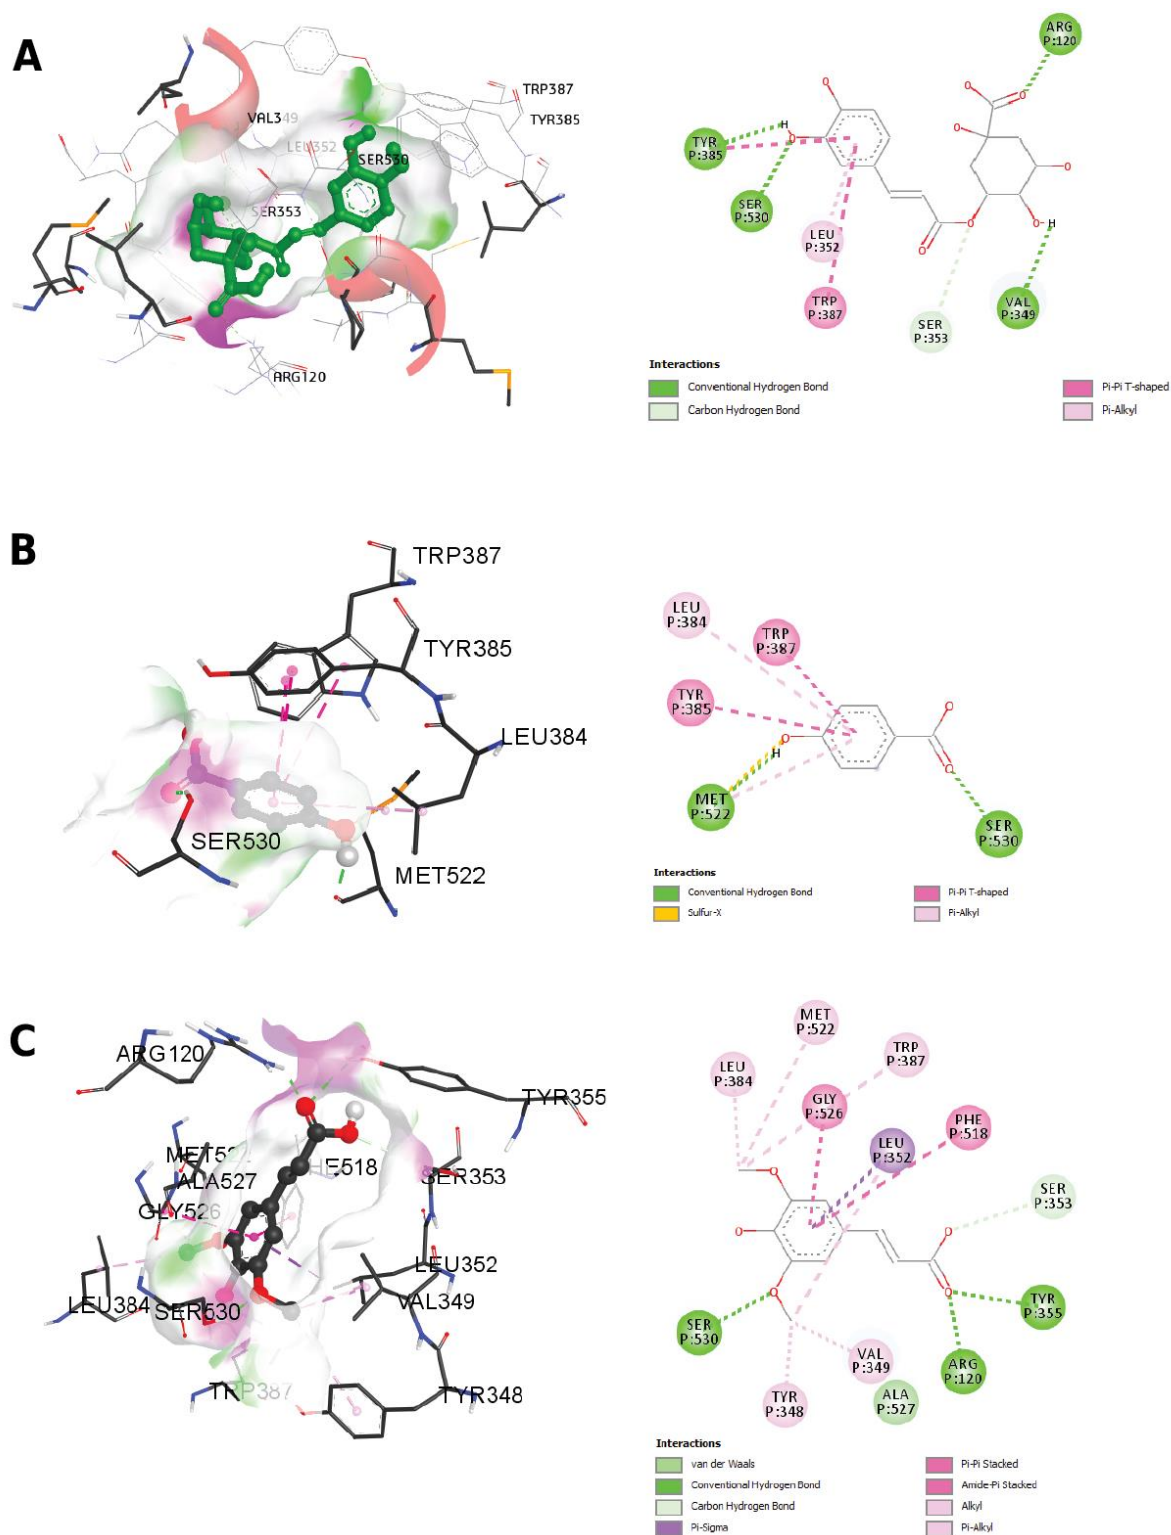

**Figure S2.** The established interactions of the most stable conformations of protein-ligand complex structures of: A – chlorogenic acid (CA), B – *p*-hydroxybenzoic acid (*p*-HBA), and C – synapic acid (SYN) and COX-1.

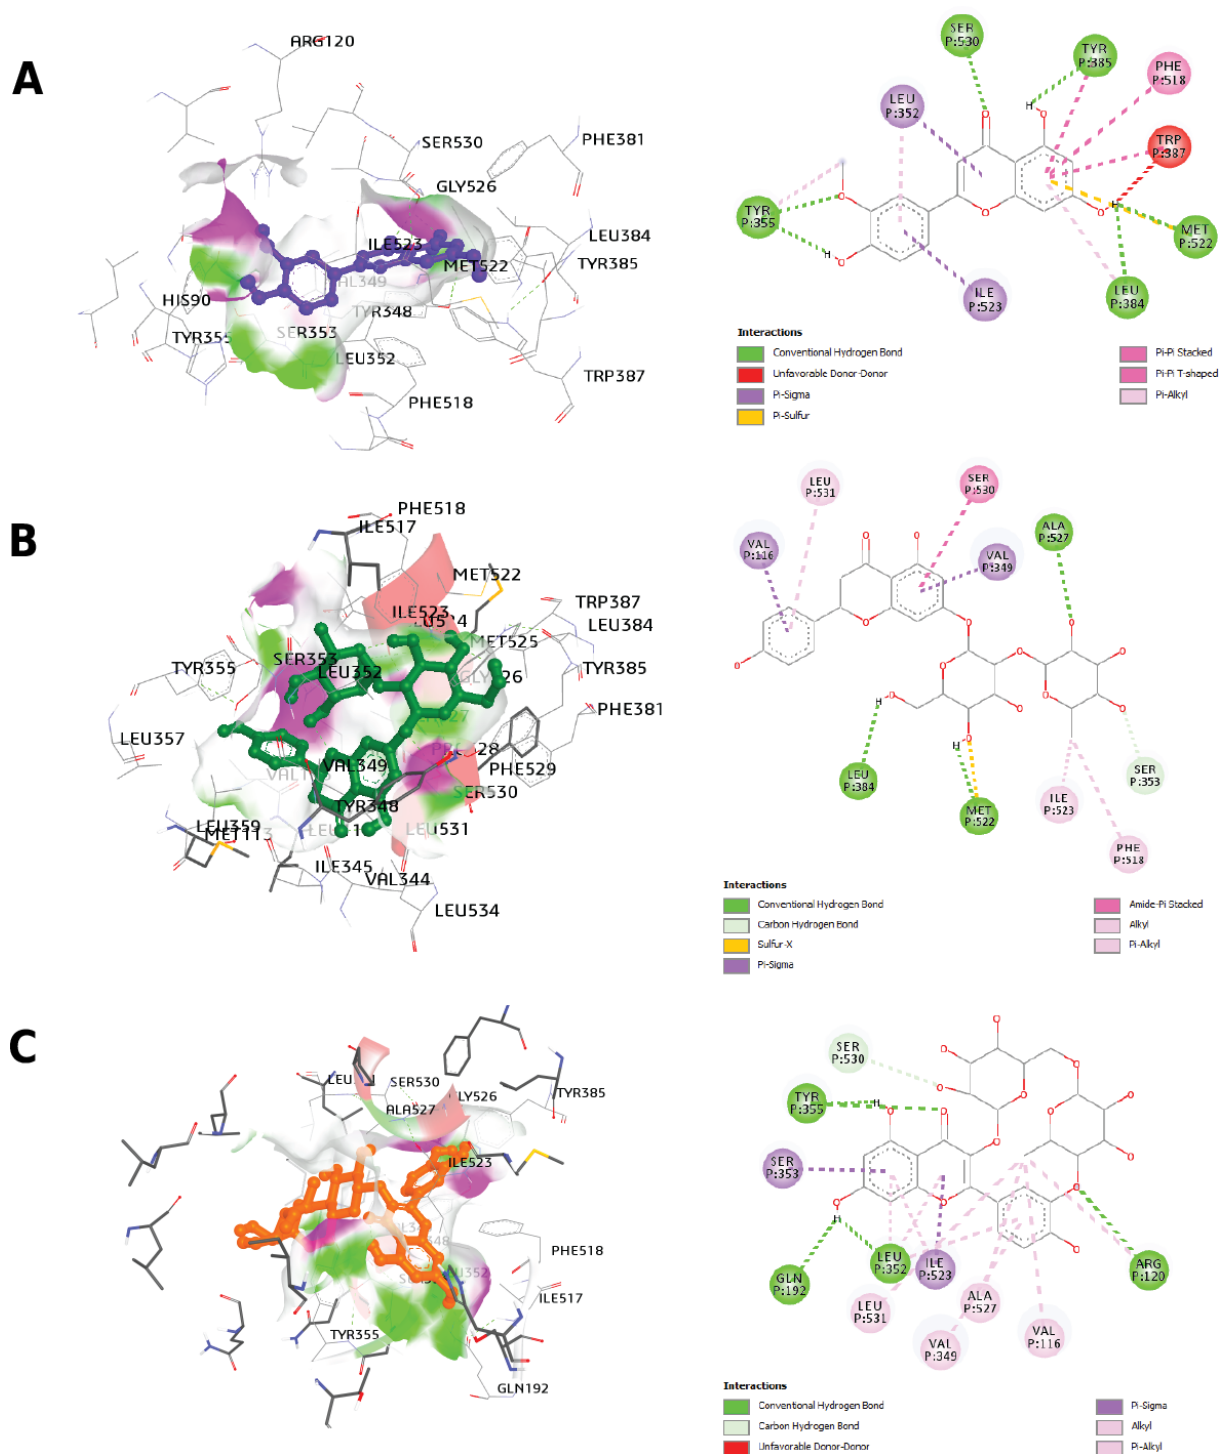

**Figure S3.** The established interactions of the most stable conformations of protein-ligand complex structures of: A – chrysoeriol (CHR), B – naringin (NAR), and C – rutin (RU) and COX-1.

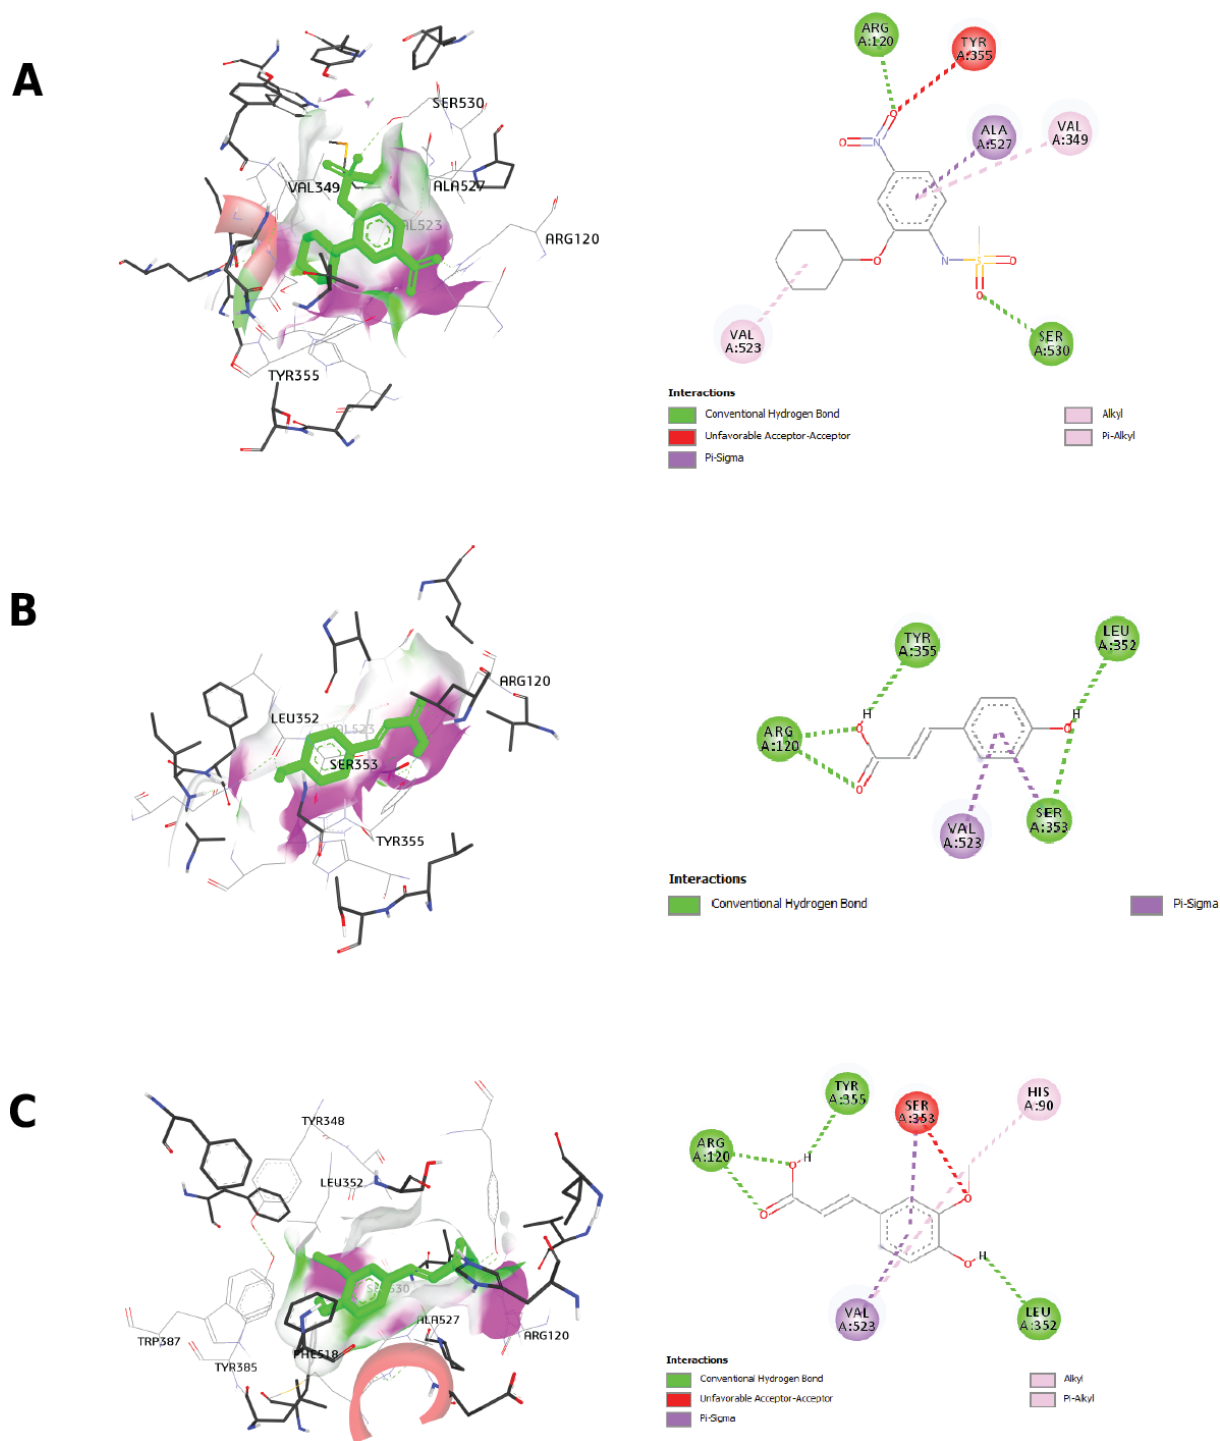

**Figure S4.** The established interactions of the most stable conformations of protein-ligand complex structures of: A – NS398, B – *p*-coumaric acid (*p*-CA), and C – ferulic acid (FA) and COX-2.

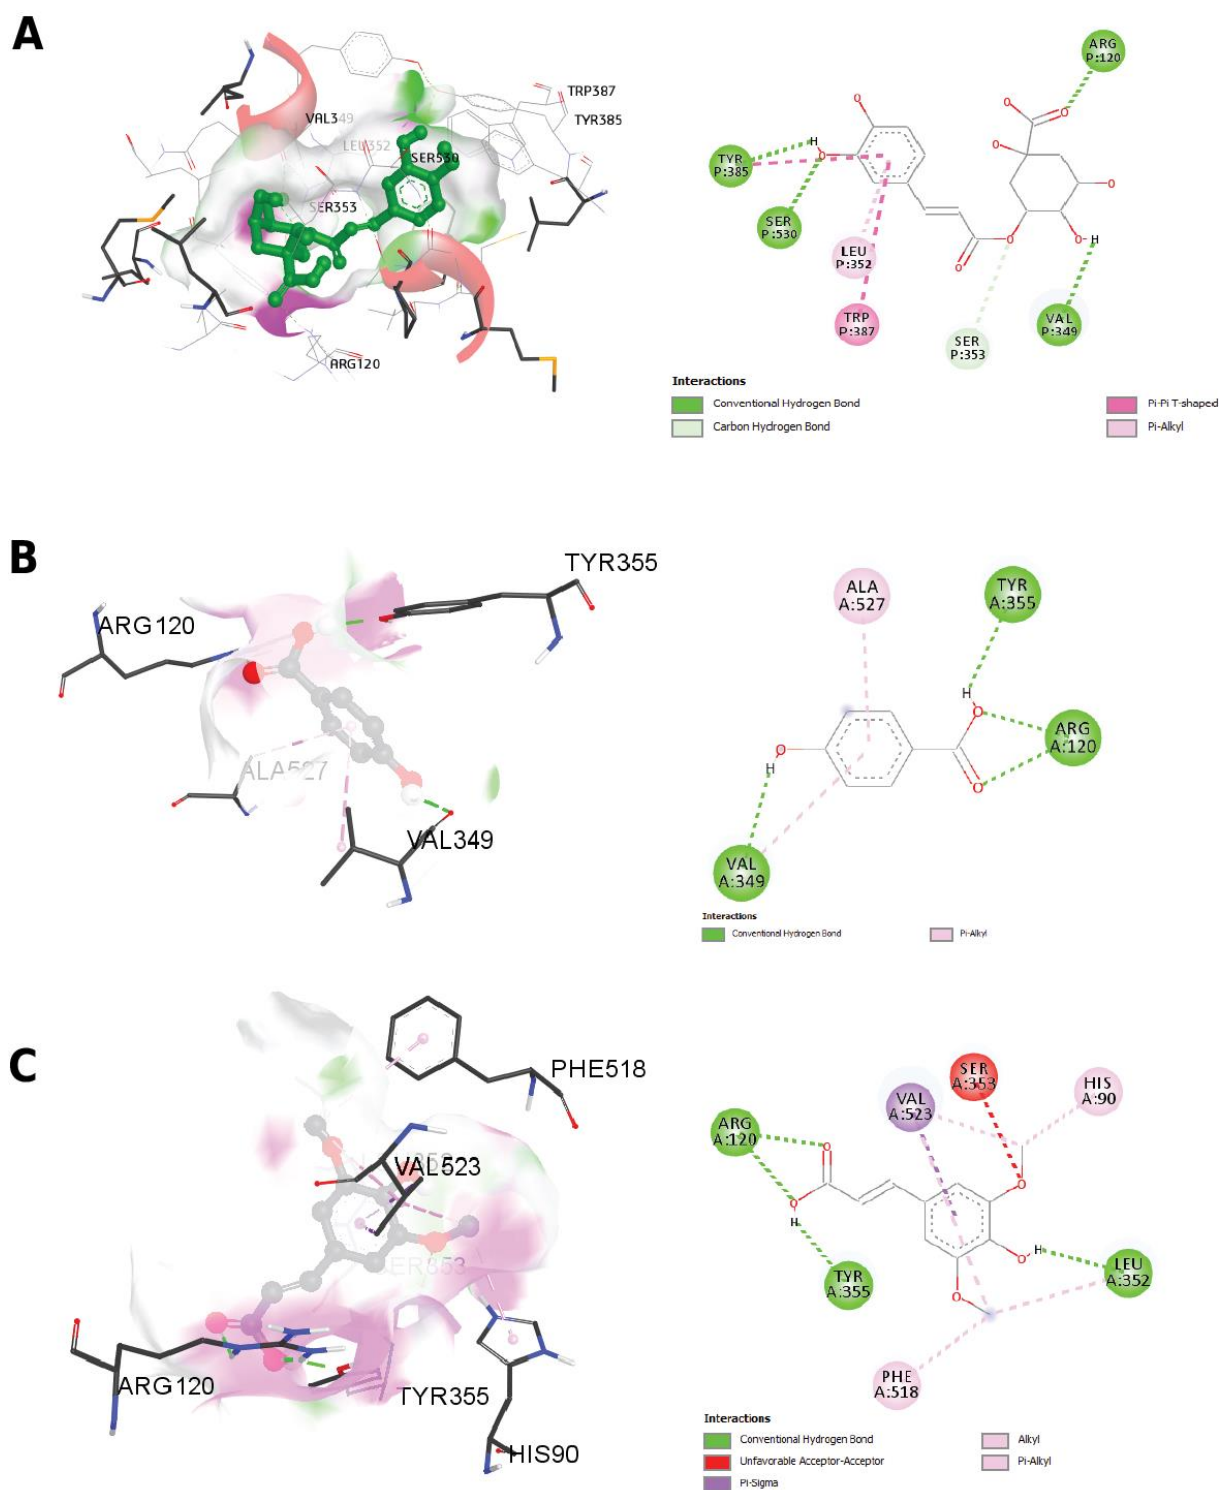

**Figure S5.** The established interactions of the most stable conformations of protein-ligand complex structures of: A – chlorogenic acid (CA), B – *p*-hydroxybenzoic acid (*p*-HBA), and C – synapic acid (SYN) and COX-2.



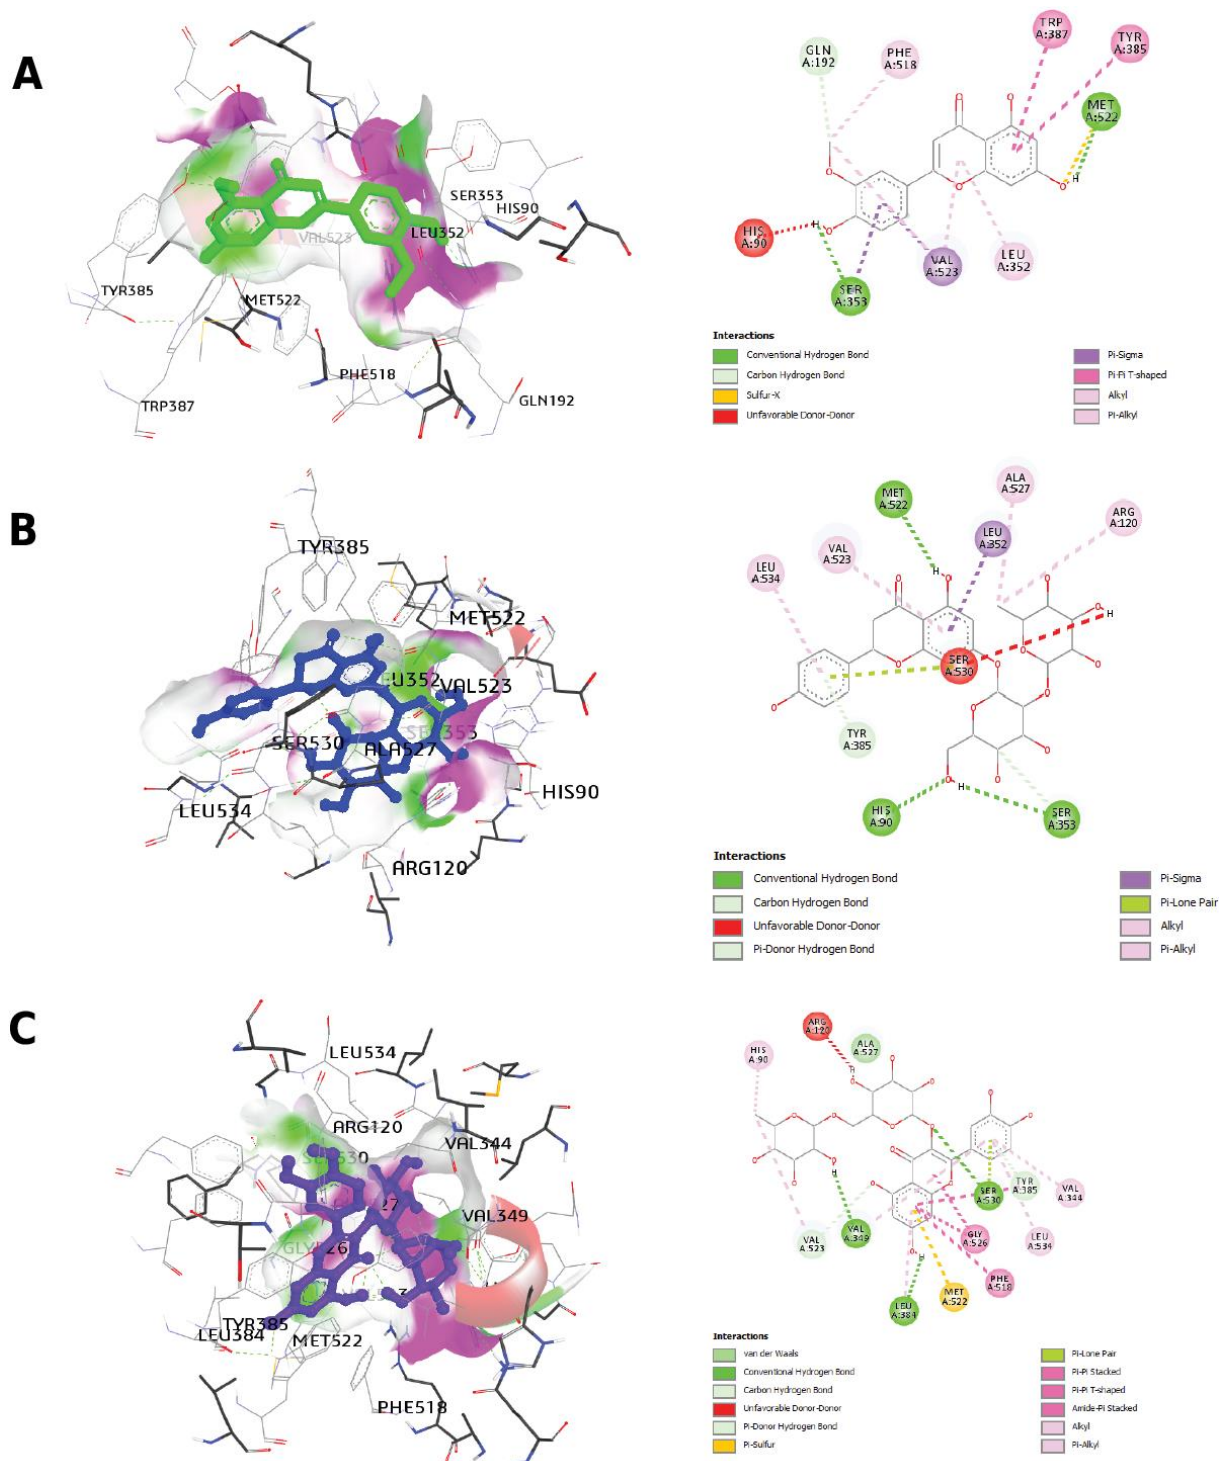

**Figure S6.** The established interactions of the most stable conformations of protein-ligand complex structures of: A – chrysoeriol (CHR), B – naringin (NAR), and C – rutin (RU) and COX-2.
